# Supplementary material for: Transcription factor FOXD1 and miRNA-204-5p play a major role in B4GALNT2 downregulation in colon cancer
Source: Springer Nature journal article supplement (doi:10.1038/s41598-025-85450-z), 2025-01-13
Supplement: MOESM2 [file 41598_2025_85450_MOESM2_ESM.pdf]

**Fig. S1**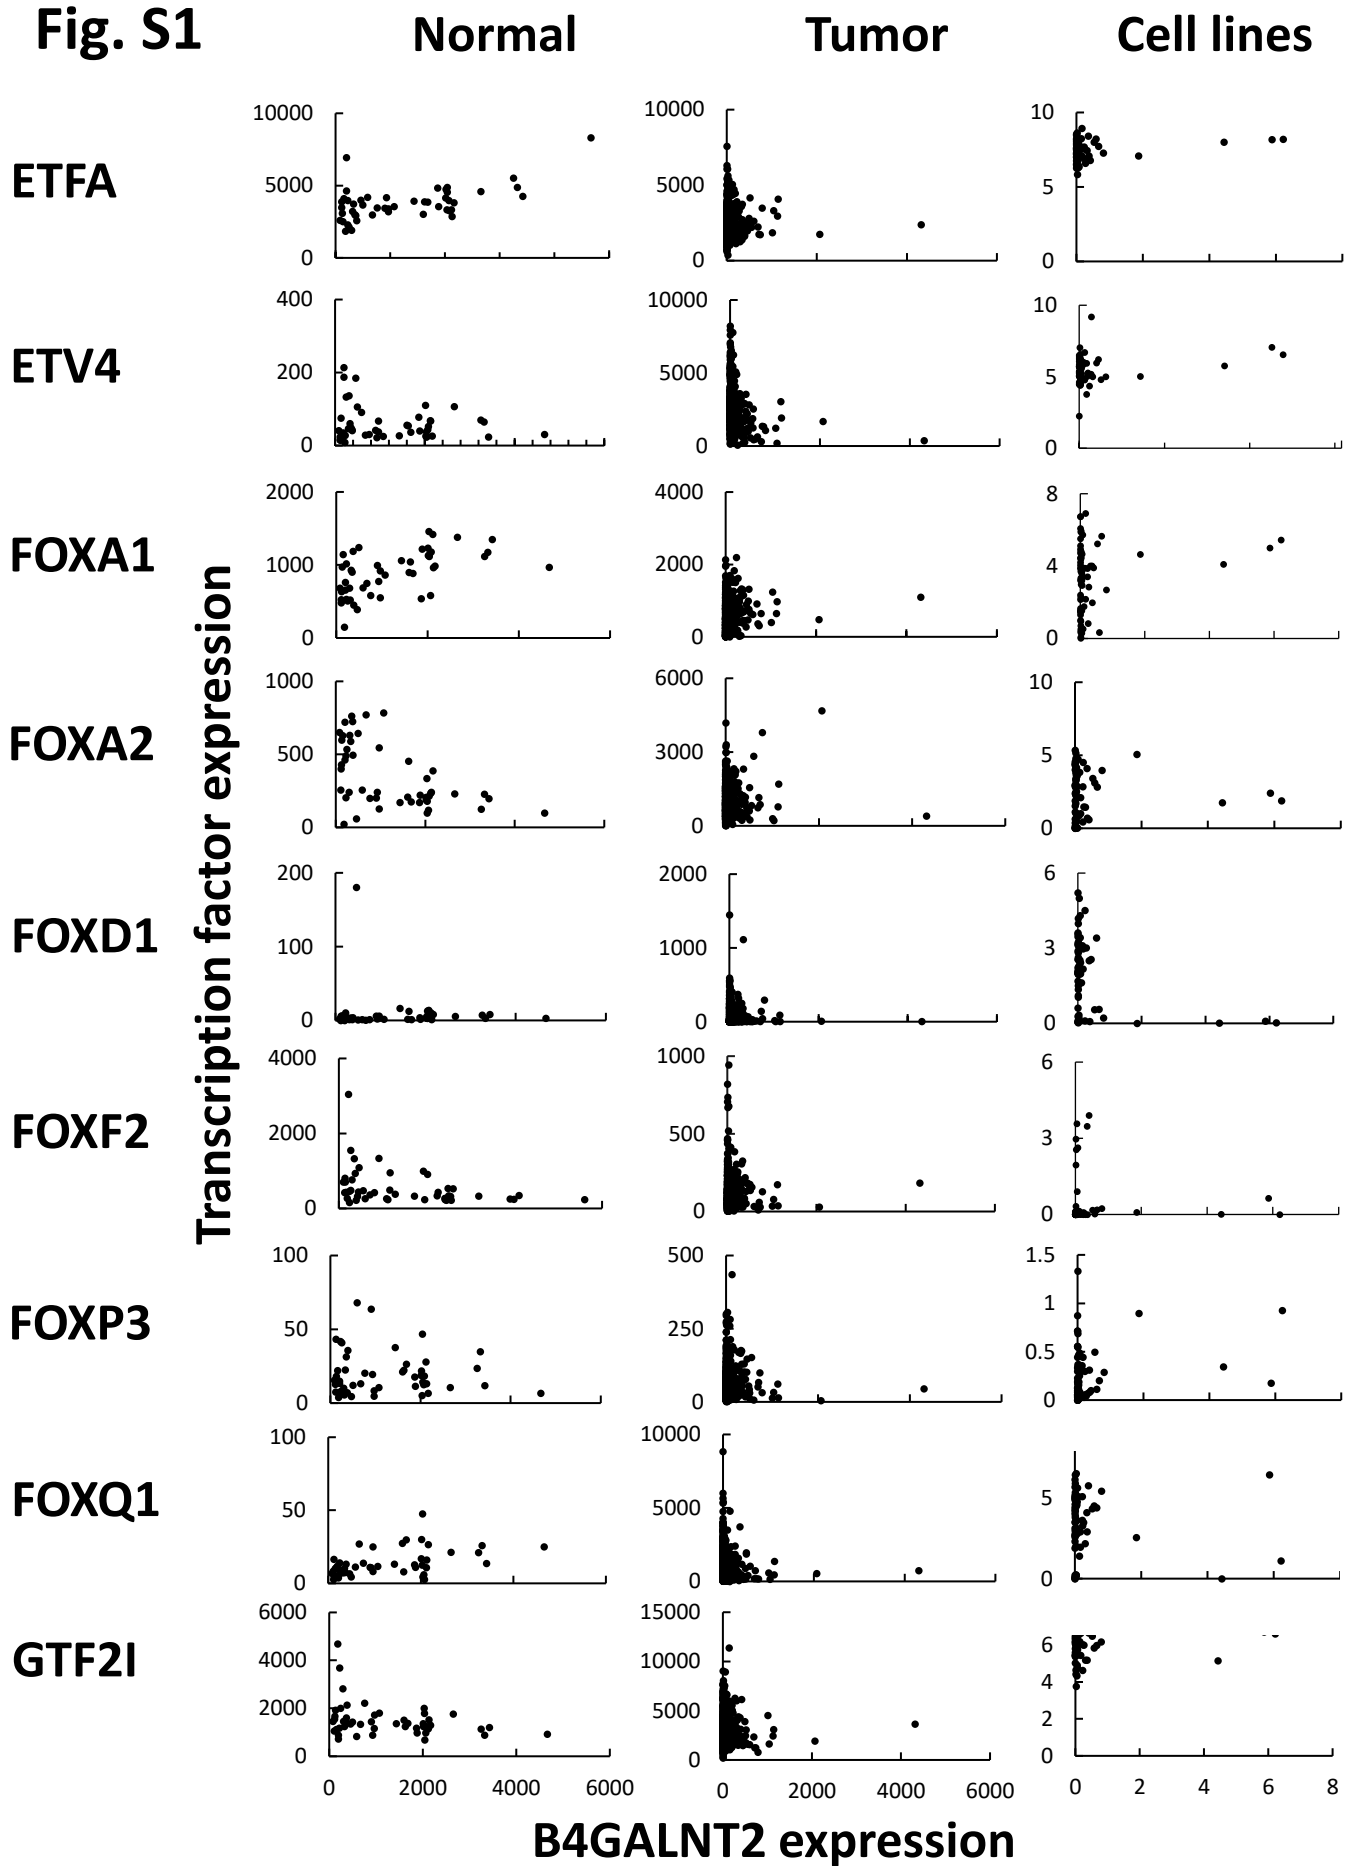

**Fig. S1 cont****Normal****Tumor****Cell lines****HNF1B**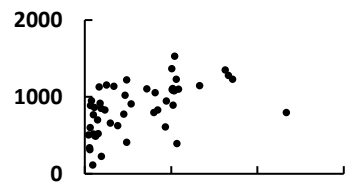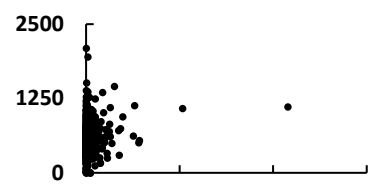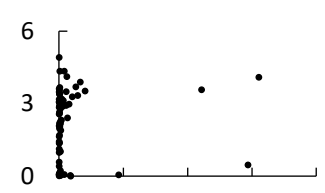**LEF1**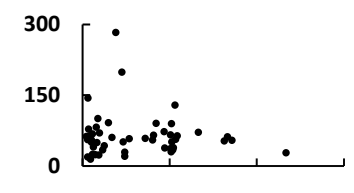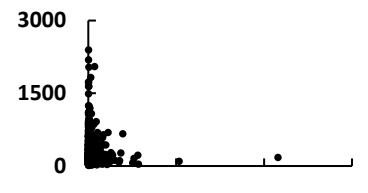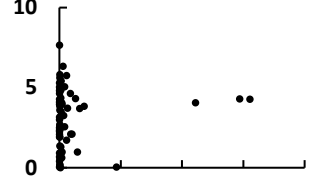**MEF2A**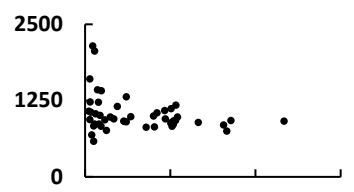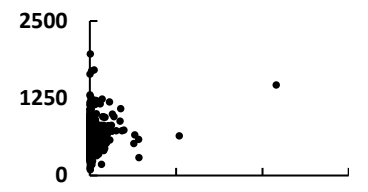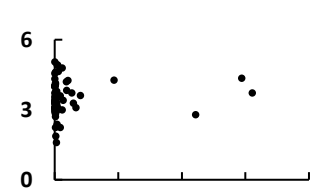**NR3C1**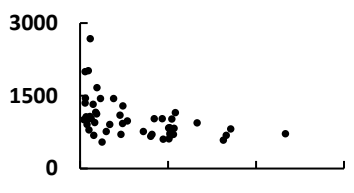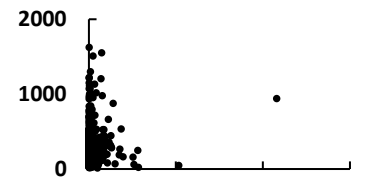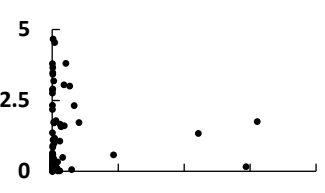**PBX1**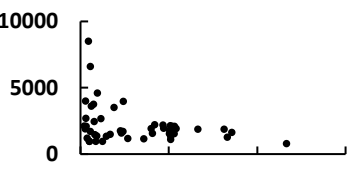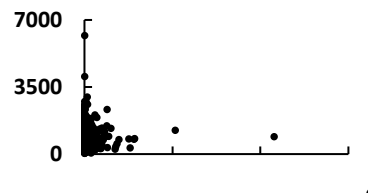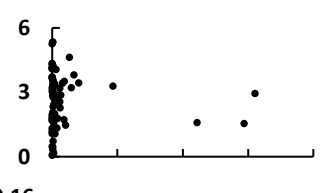**PGR**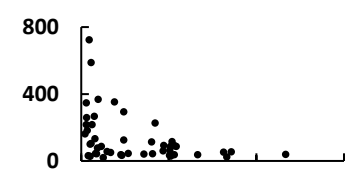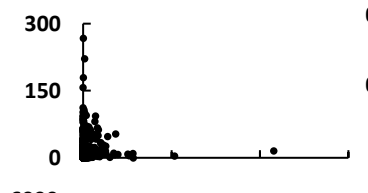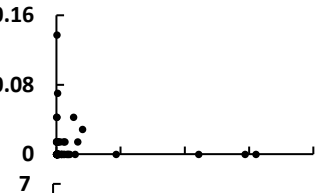**RUNX1**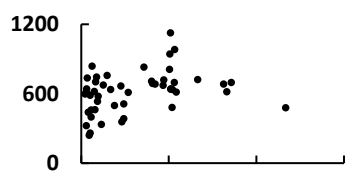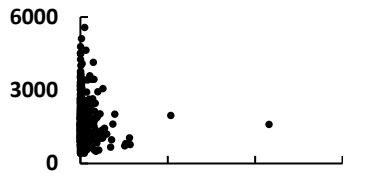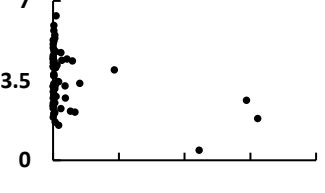**SOX5**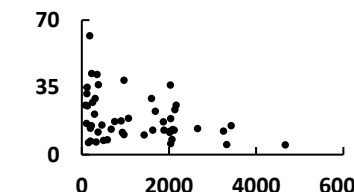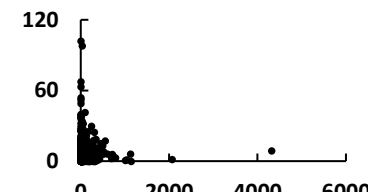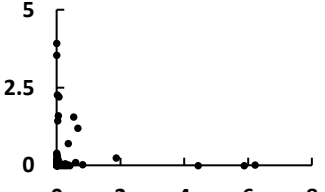**Transcription factor expression****B4GALNT2 expression**

Dot plot analysis of the expression of putative transcription factors vs. that of B4GALNT2 in the Normal and Tumor COAD cohorts of TCGA and in the Cancer Cell Lines Encyclopedia.
